# Supplementary material for: Muscle characteristics comparison and targeted metabolome analysis reveal differences in carcass traits and meat quality of three pig breeds
Source: Royal Society of Chemistry journal article supplement (doi:10.1039/d2fo03709b), 2023-01-01
Supplement: d2fo03709b1.pdf [file d2fo03709b1.pdf]

### Supplementary Materials

**Supplementary Table 1.** Ingredients and composition of the basal diet (air-dried base).

| <b>Ingredients</b>          | <b>Percentage (%)</b> | <b>Nutrient</b>           | <b>Content</b> |
|-----------------------------|-----------------------|---------------------------|----------------|
| Corn                        | 64.73                 | Digestible energy (MJ/kg) | 12.98          |
| Soybean meal                | 12.50                 | Crude protein (%)         | 14.04          |
| Wheat bran                  | 20.45                 | Total Ca (%)              | 0.53           |
| Limestone                   | 0.80                  | Available P (%)           | 0.22           |
| CaHCO <sub>3</sub>          | 0.30                  | Lysine (%)                | 0.84           |
| NaCl                        | 0.30                  | Methionine (%)            | 0.20           |
| Lysine                      | 0.40                  | Cystine (%)               | 0.44           |
| Methionine                  | 0.02                  | Threonine (%)             | 0.49           |
| Threonine                   | 0.10                  | Tryptophan (%)            | 0.15           |
| Tryptophan                  | 0.01                  |                           |                |
| Choline chloride            | 0.15                  |                           |                |
| Vitamin premix <sup>1</sup> | 0.04                  |                           |                |
| Mineral premix <sup>2</sup> | 0.20                  |                           |                |
| Total                       | 100.00                |                           |                |

<sup>1</sup> The vitamin premix provides per kg: 2,250 IU vitamin A, 220 IU vitamin D<sub>3</sub>, 16 mg vitamin E, 0.5 mg vitamin K, 2 mg vitamin B<sub>1</sub>, 5 mg vitamin B<sub>2</sub>, 4 mg vitamin B<sub>6</sub>, 0.03 mg vitamin B<sub>12</sub>, 30 mg niacin, 20 mg pantothenic acid, 0.3 mg folic acid, and 0.2 mg biotin.

<sup>2</sup> The mineral premix provides per kg: 80 mg iron, 5 mg copper, 80 mg zinc, 3 mg manganese, 0.14 mg iodine, and 0.25 mg selenium.

**Supplementary Table 2.** Primers for real-time quantitative PCR.

| <b>Gene names</b> | <b>Primers</b> | <b>Sequences (5'–3')</b> | <b>Product size (bp)</b> |
|-------------------|----------------|--------------------------|--------------------------|
| <i>ACC</i>        | Forward        | AGCAAGGTCGAGACCGAAAG     | 169                      |
|                   | Reverse        | TAAGACCACCGGCGGATAGA     |                          |
| <i>Akt</i>        | Forward        | CTGCCCTTCTACAACCAGGA     | 214                      |
|                   | Reverse        | CATACACATCCTGCCACACG     |                          |
| <i>ATGL</i>       | Forward        | CAACGCCAAGCACATCTACG     | 84                       |
|                   | Reverse        | CCAGTATCACCCAGGCAGAC     |                          |
| <i>CAT</i>        | Forward        | CAGATGAAGCATTGGAAGGAGC   | 83                       |
|                   | Reverse        | TTGTCTCCTATCGGATTCCCAG   |                          |
| <i>CPT1</i>       | Forward        | GACAAGTCCTTACCCTCATCGC   | 170                      |
|                   | Reverse        | GGGTTTGGTTTGCCAGACAG     |                          |
| <i>FABP4</i>      | Forward        | TGGAAACTTGTCTCCAGTG      | 227                      |
|                   | Reverse        | GGTACTTTCTGATCTAATGGTG   |                          |
| <i>FATP1</i>      | Forward        | ACCACTCCTACCGCATGCAG     | 78                       |
|                   | Reverse        | CCACGATGTTCCCTGCCGAGT    |                          |
| <i>FOXO1</i>      | Forward        | GCCCTGGCTCTCACAGCAAC     | 292                      |
|                   | Reverse        | GGTGAAGACTGGGTGGAAAC     |                          |
| <i>GAPDH</i>      | Forward        | GGAGCGAGATCCCGCCAACA     | 158                      |
|                   | Reverse        | ACATGGGGGCATCGGCAGAA     |                          |
| <i>GHR</i>        | Forward        | GGAAAGAGTGCCCTGATTATGTC  | 119                      |
|                   | Reverse        | ATCCACAGTCCCACCATTGC     |                          |
| <i>GPX1</i>       | Forward        | GTGAATGGCGCAAATGCTCA     | 126                      |
|                   | Reverse        | ATTGCGACACACTGGAGACC     |                          |
| <i>HSL</i>        | Forward        | CACAAGGGCTGCTTCTACGG     | 167                      |
|                   | Reverse        | AAGCGGCCACTGGTGAAGAG     |                          |
| <i>IGF-1R</i>     | Forward        | GACTTCACAGTCAAATCGG      | 154                      |
|                   | Reverse        | ACCAGACATCAGAGTGCCT      |                          |
| <i>IRS1</i>       | Forward        | CCTAGCACCAACAGGACTCA     | 239                      |
|                   | Reverse        | GAAGAGATGAAACCGCCGTC     |                          |
| <i>JAK2</i>       | Forward        | GCCACTGCCAGAACTTGAA      | 165                      |
|                   | Reverse        | TGACCACTGAATTCCACCGT     |                          |
| <i>LDH</i>        | Forward        | ACAGTGCTGACACTCTGTGG     | 179                      |
|                   | Reverse        | CTGGGAGCCCACATTCACAT     |                          |
| <i>LPL</i>        | Forward        | CTCGTGCTCAGATGCCCTAC     | 148                      |
|                   | Reverse        | GGCAGGGTGAAAGGGATGTT     |                          |
| <i>MAFbx</i>      | Forward        | CCAGAGAGTTCGGCAAGT       | 374                      |
|                   | Reverse        | GAGGGTAGCATCGCACAAAGT    |                          |
| <i>MSTN</i>       | Forward        | GTCCCGTGGATCTGAATG       | 293                      |
|                   | Reverse        | TTCCGTCGTAGCGTGATA       |                          |
| <i>mTOR</i>       | Forward        | TGATGCCCTGAAGTTCCAT      | 201                      |
|                   | Reverse        | TGGTACTTCTTCCCAGCTG      |                          |
| <i>MuRF1</i>      | Forward        | AGCACGAAGACGAGAAAATC     | 150                      |
|                   | Reverse        | TGCGGTTACTCAGCTCAGTC     |                          |
| <i>Myf6</i>       | Forward        | GCTCGTGATGACTGCCAAGGAAG  | 80                       |
|                   | Reverse        | CGATGGAAGAAAGGCACCGAAGG  |                          |
| <i>MyHC I</i>     | Forward        | GGCCCCTTCCAGCTTGA        | 63                       |
|                   | Reverse        | TGGCTGCGCCTTGGTTT        |                          |
| <i>MyHC IIa</i>   | Forward        | TTAAAAAGCTCCAAGAAGTGTTC  | 100                      |

|                                 |         |                            |     |
|---------------------------------|---------|----------------------------|-----|
|                                 | Reverse | CCATTTCTGGTCGGAACTC        |     |
| <i>MyHC IIb</i>                 | Forward | CACTTTAAGTAGTTGTCTGCCTTGAG | 80  |
|                                 | Reverse | GGCAGCAGGGCACTAGATGT       |     |
| <i>MyHC IIx</i>                 | Forward | AGCTTCAAGTTCTGCCCCACT      | 76  |
|                                 | Reverse | GGCTGCGGGTTATTGATGG        |     |
| <i>MyoD</i>                     | Forward | CAACAGCGGACGACTTCTATG      | 383 |
|                                 | Reverse | GCGCAAGATTTCCACCTT         |     |
| <i>MyoG</i>                     | Forward | GCAGGGTGCTCCTCTTCA         | 230 |
|                                 | Reverse | AGGCTACGAGCGGACTGA         |     |
| <i>PFKFB3</i>                   | Forward | CCGCATCGTGTACTACCTGAT      | 223 |
|                                 | Reverse | CGTCTGGATGGTGCTCTTCA       |     |
| <i>PGK1</i>                     | Forward | GGTGGAATGGCCTTTACCTT       | 186 |
|                                 | Reverse | GCCAATCTTGGCATTCTCAT       |     |
| <i>PPAR<math>\gamma</math></i>  | Forward | CCAGCATTTCCACTCCACACTA     | 124 |
|                                 | Reverse | GACACAGGCTCCACTTTGATG      |     |
| <i>SOD1</i>                     | Forward | AGACCTGGGCAATGTGACTG       | 102 |
|                                 | Reverse | GTGCGGCCAATGATGGAATG       |     |
| <i>SREBP1c</i>                  | Forward | GCGACGGTGCCCTCTGGTAGT      | 218 |
|                                 | Reverse | CGCAAGACGGCGGATTTA         |     |
| <i><math>\beta</math>-actin</i> | Forward | TGCGGGACATCAAGGAGAAG       | 216 |
|                                 | Reverse | AGTTGAAGGTGGTCTCGTGG       |     |

Note: *ACC*, acetyl-CoA carboxylase; *Akt*, AKT serine/threonine kinase 1; *ATGL*, adipose tissue triglyceride lipase; *CAT*, catalase; *CPT1*, carnitine palmitoyl transferase 1; *FABP4*, fatty acid binding protein 4; *FATP1*, fatty acid transport protein 1; *FOXO1*, forkhead box O1; *GAPDH*, glyceraldehyde-3-phosphate dehydrogenase; *GHR*, growth hormone receptor; *GPX1*, glutathione peroxidase 1; *HSL*, hormone-sensitive triglyceride lipase; *IGF-IR*, insulin-like growth factor 1 receptor; *IRS1*, insulin receptor substrate 1; *JAK2*, janus kinase 2; *LDH*, lactate dehydrogenase; *LPL*, lipoprotein lipase; *MAFbx*, muscle atrophy F-box; *MSTN*, myostatin; *mTOR*, mechanistic target of rapamycin kinase; *MuRF1*, muscle RING finger 1; *Myf6*, myogenic factor 6; *MyHC I*, myosin heavy-chain I; *MyHC IIa*, myosin heavy-chain IIa; *MyHC IIb*, myosin heavy-chain IIb; *MyHC IIx*, myosin heavy-chain IIx; *MyoD*, myogenic differentiation 1; *MyoG*, myogenin; *PFKFB3*, 6-phosphofructo-2-kinase/fructose-2,6-biphosphatase 3; *PGK1*, phosphoglycerate kinase 1; *PPAR $\gamma$* , peroxisome proliferation-activated receptor- $\gamma$ ; *SOD1*, superoxide dismutase 1; *SREBP1c*, sterol regulatory elementbinding protein 1c.

**Supplementary Table 3.** Contents of metabolites that differ in one-way ANOVA in the *longissimus dorsi* muscle of Duroc, TB, and XB pigs at 185 days of age.

| Items, $\mu\text{mol/g}$       | Duroc Pigs          | TB Pigs             | XB Pigs              | SEM   | <i>P</i> -values |
|--------------------------------|---------------------|---------------------|----------------------|-------|------------------|
| <b>Amino acids</b>             |                     |                     |                      |       |                  |
| 5-aminolevulinic acid          | 0.011 <sup>b</sup>  | 0.019 <sup>a</sup>  | 0.014 <sup>ab</sup>  | 0.001 | 0.018            |
| L-glutamic acid                | 0.717 <sup>b</sup>  | 1.293 <sup>a</sup>  | 1.049 <sup>ab</sup>  | 0.094 | 0.034            |
| L-homocitrulline               | 0.003 <sup>b</sup>  | 0.004 <sup>a</sup>  | 0.004 <sup>a</sup>   | 0.000 | 0.027            |
| L-isoleucine                   | 0.826 <sup>b</sup>  | 1.277 <sup>a</sup>  | 0.861 <sup>b</sup>   | 0.085 | 0.048            |
| Phosphoserine                  | 1.592 <sup>b</sup>  | 1.937 <sup>a</sup>  | 1.790 <sup>ab</sup>  | 0.053 | 0.021            |
| Pyroglutamic acid              | 0.757 <sup>b</sup>  | 1.214 <sup>a</sup>  | 1.038 <sup>ab</sup>  | 0.074 | 0.032            |
| <b>Bile acids</b>              |                     |                     |                      |       |                  |
| D-ribose-5-phosphate           | 10.684 <sup>b</sup> | 14.444 <sup>a</sup> | 13.808 <sup>ab</sup> | 0.683 | 0.048            |
| <b>Carbohydrates</b>           |                     |                     |                      |       |                  |
| N-acetyl-D-glucosamine         | 0.032 <sup>b</sup>  | 0.051 <sup>a</sup>  | 0.038 <sup>ab</sup>  | 0.003 | 0.027            |
| N-acetylneuraminic acid        | 0.100 <sup>b</sup>  | 0.153 <sup>a</sup>  | 0.126 <sup>ab</sup>  | 0.008 | 0.015            |
| <b>Carnitines</b>              |                     |                     |                      |       |                  |
| 3-hydroxyisovalerylcarnitine   | 0.030 <sup>b</sup>  | 0.048 <sup>a</sup>  | 0.053 <sup>a</sup>   | 0.004 | 0.022            |
| Decanoylcarnitine              | 0.003 <sup>b</sup>  | 0.003 <sup>b</sup>  | 0.006 <sup>a</sup>   | 0.001 | 0.020            |
| Glutaryl carnitine             | 0.003 <sup>b</sup>  | 0.005 <sup>a</sup>  | 0.002 <sup>c</sup>   | 0.000 | <0.001           |
| Lauroyl carnitine              | 0.005 <sup>b</sup>  | 0.008 <sup>ab</sup> | 0.012 <sup>a</sup>   | 0.001 | 0.028            |
| Methylmalonylcarnitine         | 0.812 <sup>b</sup>  | 1.147 <sup>a</sup>  | 1.202 <sup>a</sup>   | 0.069 | 0.036            |
| Octanoylcarnitine              | 0.004 <sup>b</sup>  | 0.006 <sup>b</sup>  | 0.011 <sup>a</sup>   | 0.001 | 0.012            |
| <b>Fatty acids</b>             |                     |                     |                      |       |                  |
| 10-trans-heptadecenoic acid    | 0.033 <sup>b</sup>  | 0.060 <sup>a</sup>  | 0.042 <sup>b</sup>   | 0.004 | 0.012            |
| 10Z-heptadecenoic acid         | 0.065 <sup>b</sup>  | 0.116 <sup>a</sup>  | 0.083 <sup>ab</sup>  | 0.008 | 0.022            |
| 2-hydroxy-3-methylbutyric acid | 0.222 <sup>a</sup>  | 0.191 <sup>ab</sup> | 0.144 <sup>b</sup>   | 0.011 | 0.010            |
| 8-11-14-eicosatrienoic acid    | 0.327 <sup>b</sup>  | 0.557 <sup>a</sup>  | 0.351 <sup>b</sup>   | 0.041 | 0.031            |
| Arachidonic acid               | 1.176 <sup>b</sup>  | 1.975 <sup>a</sup>  | 1.404 <sup>ab</sup>  | 0.131 | 0.029            |
| Eicosapentaenoic acid EPA      | 0.048 <sup>b</sup>  | 0.089 <sup>a</sup>  | 0.055 <sup>b</sup>   | 0.007 | 0.038            |
| Oleic acid                     | 24.513 <sup>b</sup> | 37.954 <sup>a</sup> | 29.808 <sup>ab</sup> | 2.106 | 0.024            |
| Petroselinic acid              | 1.256 <sup>b</sup>  | 1.935 <sup>a</sup>  | 1.493 <sup>ab</sup>  | 0.108 | 0.025            |

Data are presented as means with their SEM ( $n = 8$ ). <sup>a-c</sup> Mean values with different superscript letters indicate significant differences ( $P < 0.05$ ). TB, Taoyuan black pigs; XB, Xiangcun black pigs.

**Supplementary Table 4.** Differential metabolites enrichment in the *longissimus dorsi* muscle of Duroc, TB, and XB pigs at 185 days of age.

| <b>Pathways</b>                             | <b>Total<sup>1</sup></b> | <b>Hits<sup>2</sup></b> | <b>P-values<sup>3</sup></b> | <b>Differential metabolites</b>            |
|---------------------------------------------|--------------------------|-------------------------|-----------------------------|--------------------------------------------|
| Phenylalanine metabolism                    | 10                       | 2                       | 0.009                       | Phenylacetic acid;<br>Hippuric acid        |
| Glycerolipid metabolism                     | 16                       | 2                       | 0.023                       | Glyceraldehyde; Glyceric acid              |
| $\beta$ -alanine metabolism                 | 21                       | 2                       | 0.039                       | Hydroxypropionic acid;<br>$\beta$ -alanine |
| Propanoate metabolism                       | 23                       | 2                       | 0.046                       | $\beta$ -alanine;<br>Hydroxypropionic acid |
| Pyrimidine metabolism                       | 39                       | 2                       | 0.116                       | Ureidosuccinic acid; $\beta$ -alanine      |
| Nicotinate and nicotinamide metabolism      | 15                       | 1                       | 0.205                       | Nicotinic acid                             |
| Pantothenate and CoA biosynthesis           | 19                       | 1                       | 0.253                       | $\beta$ -alanine                           |
| Fructose and mannose metabolism             | 20                       | 1                       | 0.264                       | Glyceraldehyde                             |
| Pentose phosphate pathway                   | 22                       | 1                       | 0.286                       | Glyceric acid                              |
| Alanine, aspartate and glutamate metabolism | 28                       | 1                       | 0.350                       | Ureidosuccinic acid                        |
| Glyoxylate and dicarboxylate metabolism     | 32                       | 1                       | 0.389                       | Glyceric acid                              |
| Glycine, serine, and threonine metabolism   | 33                       | 1                       | 0.398                       | Glyceric acid                              |
| Cysteine and methionine metabolism          | 33                       | 1                       | 0.398                       | L- $\alpha$ -aminobutyric acid             |
| Fatty acid degradation                      | 39                       | 1                       | 0.452                       | L-palmitoylcarnitine                       |

<sup>1</sup> Total number of metabolites in this pathway.

<sup>2</sup> Number of differential metabolites in the present study.

<sup>3</sup> Raw *P*-values of enrichment analysis.
